# Supplementary material for: Transcriptome Analysis Reveals Altered Expression of Memory and Neurotransmission Associated Genes in the REM Sleep Deprived Rat Brain
Source: Front Mol Neurosci. 2017 Mar 17;10:67. doi: 10.3389/fnmol.2017.00067 (PMC5355427; doi:10.3389/fnmol.2017.00067)
Supplement: Supplementary file 5 [file Data_Sheet_5.XLSX]

## Sheet: GO of DEG q<0.05
Gene Ontology of differentially expressed genes (q<0.05) after REMSD as compared FMC
Category	Term	Count	%	PValue	Genes	List Total	Pop Hits	Pop Total	Fold Enrichment
GOTERM_BP_FAT	GO:0051969~regulation of transmission of nerve impulse	4	3.07692	0.000160879	LNPEP, AVP, PMCH, OXT	9	176	12092	30.5354
GOTERM_BP_FAT	GO:0031644~regulation of neurological system process	4	3.07692	0.000195561	LNPEP, AVP, PMCH, OXT	9	188	12092	28.5863
SP_PIR_KEYWORDS	amidation	3	2.30769	0.000400685	AVP, PMCH, OXT	8	40	8979	84.1781
GOTERM_CC_FAT	GO:0000786~nucleosome	3	2.30769	0.000402251	HIST1H4M, HIST1H1D, HIST2H3C2, HIST2H4	8	48	10776	84.1875
GOTERM_BP_FAT	GO:0006334~nucleosome assembly	3	2.30769	0.000756489	HIST1H4M, HIST1H1D, HIST2H3C2, HIST2H4	9	64	12092	62.9792
GOTERM_CC_FAT	GO:0032993~protein-DNA complex	3	2.30769	0.000807328	HIST1H4M, HIST1H1D, HIST2H3C2, HIST2H4	8	68	10776	59.4265
GOTERM_BP_FAT	GO:0031497~chromatin assembly	3	2.30769	0.000828837	HIST1H4M, HIST1H1D, HIST2H3C2, HIST2H4	9	67	12092	60.1592
GOTERM_BP_FAT	GO:0034728~nucleosome organization	3	2.30769	0.000878862	HIST1H4M, HIST1H1D, HIST2H3C2, HIST2H4	9	69	12092	58.4155
GOTERM_BP_FAT	GO:0044057~regulation of system process	4	3.07692	0.000922987	LNPEP, AVP, PMCH, OXT	9	319	12092	16.8471
GOTERM_BP_FAT	GO:0065004~protein-DNA complex assembly	3	2.30769	0.000930317	HIST1H4M, HIST1H1D, HIST2H3C2, HIST2H4	9	71	12092	56.77
SP_PIR_KEYWORDS	chromosomal protein	3	2.30769	0.000994705	HIST1H4M, HIST1H1D, HIST2H3C2, HIST2H4	8	63	8979	53.4464
INTERPRO	IPR016321:Nonapeptide hormone precursor	2	1.53846	0.00136679	AVP, OXT	8	2	10240	1280
INTERPRO	IPR000981:Neurohypophysial hormone	2	1.53846	0.00136679	AVP, OXT	8	2	10240	1280
SMART	SM00003:NH	2	1.53846	0.00157341	AVP, OXT	5	2	5083	1016.6
GOTERM_BP_FAT	GO:0006323~DNA packaging	3	2.30769	0.00158993	HIST1H4M, HIST1H1D, HIST2H3C2, HIST2H4	9	93	12092	43.3405
GOTERM_BP_FAT	GO:0006333~chromatin assembly or disassembly	3	2.30769	0.00176354	HIST1H4M, HIST1H1D, HIST2H3C2, HIST2H4	9	98	12092	41.1293
GOTERM_BP_FAT	GO:0050801~ion homeostasis	4	3.07692	0.00180295	LNPEP, AVP, PMCH, OXT	9	402	12092	13.3687
GOTERM_BP_FAT	GO:0007204~elevation of cytosolic calcium ion concentration	3	2.30769	0.00190868	AVP, PMCH, OXT	9	102	12092	39.5163
GOTERM_BP_FAT	GO:0002125~maternal aggressive behavior	2	1.53846	0.00198363	AVP, OXT	9	3	12092	895.704
GOTERM_BP_FAT	GO:0008217~regulation of blood pressure	3	2.30769	0.00205935	AVP, PMCH, OXT	9	106	12092	38.0252
GOTERM_BP_FAT	GO:0007610~behavior	4	3.07692	0.00210161	BC1, AVP, PMCH, OXT	9	424	12092	12.6751
SP_PIR_KEYWORDS	hormone	3	2.30769	0.00210912	AVP, PMCH, OXT	8	92	8979	36.5992
GOTERM_MF_FAT	GO:0005179~hormone activity	3	2.30769	0.00223265	AVP, PMCH, OXT	8	126	11963	35.6042
GOTERM_BP_FAT	GO:0051480~cytosolic calcium ion homeostasis	3	2.30769	0.00237721	AVP, PMCH, OXT	9	114	12092	35.3567
PIR_SUPERFAMILY	PIRSF001815:nonapeptide hormone precursor	2	1.53846	0.00274568	AVP, OXT	7	2	4368	624
PIR_SUPERFAMILY	PIRSF001815:Nonapeptide_hormone_precursor	2	1.53846	0.00274568	AVP, OXT	7	2	4368	624
GOTERM_BP_FAT	GO:0048878~chemical homeostasis	4	3.07692	0.0032168	LNPEP, AVP, PMCH, OXT	9	492	12092	10.9232
GOTERM_BP_FAT	GO:0002118~aggressive behavior	2	1.53846	0.00330414	AVP, OXT	9	5	12092	537.422
GOTERM_BP_FAT	GO:0045924~regulation of female receptivity	2	1.53846	0.00330414	AVP, OXT	9	5	12092	537.422
GOTERM_BP_FAT	GO:0060180~female mating behavior	2	1.53846	0.00396383	AVP, OXT	9	6	12092	447.852
GOTERM_BP_FAT	GO:0065003~macromolecular complex assembly	4	3.07692	0.00427965	HIST1H4M, HIST1H1D, HIST2H3C2, HBB, HIST2H4	9	544	12092	9.87908
GOTERM_BP_FAT	GO:0003013~circulatory system process	3	2.30769	0.00434539	AVP, PMCH, OXT	9	155	12092	26.0043
GOTERM_BP_FAT	GO:0008015~blood circulation	3	2.30769	0.00434539	AVP, PMCH, OXT	9	155	12092	26.0043
GOTERM_BP_FAT	GO:0051241~negative regulation of multicellular organismal process	3	2.30769	0.00451128	AVP, PMCH, OXT	9	158	12092	25.5105
SP_PIR_KEYWORDS	methylation	3	2.30769	0.00461576	HIST1H4M, HIST1H1D, HIST2H3C2, HIST2H4	8	137	8979	24.5776
GOTERM_BP_FAT	GO:0042711~maternal behavior	2	1.53846	0.00462312	AVP, OXT	9	7	12092	383.873
GOTERM_BP_FAT	GO:0060746~parental behavior	2	1.53846	0.00462312	AVP, OXT	9	7	12092	383.873
GOTERM_BP_FAT	GO:0006874~cellular calcium ion homeostasis	3	2.30769	0.00485188	AVP, PMCH, OXT	9	164	12092	24.5772
GOTERM_BP_FAT	GO:0050804~regulation of synaptic transmission	3	2.30769	0.00490978	LNPEP, PMCH, OXT	9	165	12092	24.4283
GOTERM_BP_FAT	GO:0043933~macromolecular complex subunit organization	4	3.07692	0.00503027	HIST1H4M, HIST1H1D, HIST2H3C2, HBB, HIST2H4	9	576	12092	9.33025
GOTERM_BP_FAT	GO:0055074~calcium ion homeostasis	3	2.30769	0.00508543	AVP, PMCH, OXT	9	168	12092	23.9921
GOTERM_CC_FAT	GO:0000785~chromatin	3	2.30769	0.00527777	HIST1H4M, HIST1H1D, HIST2H3C2, HIST2H4	8	176	10776	22.9602
GOTERM_BP_FAT	GO:0003078~regulation of natriuresis	2	1.53846	0.00528204	AVP, OXT	9	8	12092	335.889
GOTERM_BP_FAT	GO:0006875~cellular metal ion homeostasis	3	2.30769	0.00569184	AVP, PMCH, OXT	9	178	12092	22.6442
GOTERM_BP_FAT	GO:0042538~hyperosmotic salinity response	2	1.53846	0.00594058	AVP, OXT	9	9	12092	298.568
GOTERM_BP_FAT	GO:0044062~regulation of excretion	2	1.53846	0.00594058	AVP, OXT	9	9	12092	298.568
GOTERM_BP_FAT	GO:0055065~metal ion homeostasis	3	2.30769	0.00613535	AVP, PMCH, OXT	9	185	12092	21.7874
SP_PIR_KEYWORDS	cleavage on pair of basic residues	3	2.30769	0.00663393	AVP, PMCH, OXT	8	165	8979	20.4068
GOTERM_CC_FAT	GO:0030141~secretory granule	3	2.30769	0.00716912	LNPEP, AVP, OXT	8	206	10776	19.6165
GOTERM_BP_FAT	GO:0030005~cellular di-, tri-valent inorganic cation homeostasis	3	2.30769	0.00762981	AVP, PMCH, OXT	9	207	12092	19.4718
GOTERM_BP_FAT	GO:0007625~grooming behavior	2	1.53846	0.0079139	AVP, OXT	9	12	12092	223.926
GOTERM_BP_FAT	GO:0033057~reproductive behavior in a multicellular organism	2	1.53846	0.0079139	AVP, OXT	9	12	12092	223.926
GOTERM_BP_FAT	GO:0055066~di-, tri-valent inorganic cation homeostasis	3	2.30769	0.00843345	AVP, PMCH, OXT	9	218	12092	18.4893
GOTERM_MF_FAT	GO:0005184~neuropeptide hormone activity	2	1.53846	0.0087463	AVP, OXT	8	15	11963	199.383
GOTERM_BP_FAT	GO:0042592~homeostatic process	4	3.07692	0.00917736	LNPEP, AVP, PMCH, OXT	9	714	12092	7.52692
GOTERM_BP_FAT	GO:0042756~drinking behavior	2	1.53846	0.00922754	PMCH, OXT	9	14	12092	191.937
GOTERM_BP_FAT	GO:0007617~mating behavior	2	1.53846	0.00922754	AVP, OXT	9	14	12092	191.937
GOTERM_BP_FAT	GO:0007620~copulation	2	1.53846	0.00922754	AVP, OXT	9	14	12092	191.937
GOTERM_BP_FAT	GO:0030003~cellular cation homeostasis	3	2.30769	0.00958887	AVP, PMCH, OXT	9	233	12092	17.299
GOTERM_BP_FAT	GO:0034622~cellular macromolecular complex assembly	3	2.30769	0.00990847	HIST1H4M, HIST1H1D, HIST2H3C2, HIST2H4	9	237	12092	17.007
SP_PIR_KEYWORDS	amidated carboxyl end	2	1.53846	0.0100942	AVP, OXT	8	13	8979	172.673
SP_PIR_KEYWORDS	citrullination	2	1.53846	0.0100942	HIST1H4M, HIST2H3C2, HIST2H4	8	13	8979	172.673
GOTERM_BP_FAT	GO:0006972~hyperosmotic response	2	1.53846	0.0105397	AVP, OXT	9	16	12092	167.944
GOTERM_BP_FAT	GO:0051240~positive regulation of multicellular organismal process	3	2.30769	0.0108959	AVP, PMCH, OXT	9	249	12092	16.1874
GOTERM_BP_FAT	GO:0006325~chromatin organization	3	2.30769	0.0110647	HIST1H4M, HIST1H1D, HIST2H3C2, HIST2H4	9	251	12092	16.0584
GOTERM_BP_FAT	GO:0009651~response to salt stress	2	1.53846	0.0111951	AVP, OXT	9	17	12092	158.065
GOTERM_BP_FAT	GO:0035176~social behavior	2	1.53846	0.0111951	AVP, OXT	9	17	12092	158.065
GOTERM_BP_FAT	GO:0055080~cation homeostasis	3	2.30769	0.0120137	AVP, PMCH, OXT	9	262	12092	15.3842
INTERPRO	IPR007125:Histone core	2	1.53846	0.0122436	HIST1H4M, HIST2H3C2, HIST2H4	8	18	10240	142.222
GOTERM_BP_FAT	GO:0034621~cellular macromolecular complex subunit organization	3	2.30769	0.0122787	HIST1H4M, HIST1H1D, HIST2H3C2, HIST2H4	9	265	12092	15.2101
GOTERM_BP_FAT	GO:0046903~secretion	3	2.30769	0.0124568	LNPEP, AVP, OXT	9	267	12092	15.0961
GOTERM_BP_FAT	GO:0019098~reproductive behavior	2	1.53846	0.0138133	AVP, OXT	9	21	12092	127.958
GOTERM_CC_FAT	GO:0044427~chromosomal part	3	2.30769	0.0156461	HIST1H4M, HIST1H1D, HIST2H3C2, HIST2H4	8	309	10776	13.0777
SP_PIR_KEYWORDS	nucleosome core	2	1.53846	0.0162625	HIST1H4M, HIST2H3C2, HIST2H4	8	21	8979	106.893
GOTERM_BP_FAT	GO:0002027~regulation of heart rate	2	1.53846	0.0164254	PMCH, OXT	9	25	12092	107.484
GOTERM_BP_FAT	GO:0007618~mating	2	1.53846	0.0164254	AVP, OXT	9	25	12092	107.484
GOTERM_BP_FAT	GO:0007588~excretion	2	1.53846	0.0177292	LNPEP, AVP	9	27	12092	99.5226
GOTERM_BP_FAT	GO:0051970~negative regulation of transmission of nerve impulse	2	1.53846	0.0183805	AVP, PMCH	9	28	12092	95.9683
SP_PIR_KEYWORDS	ubl conjugation	3	2.30769	0.0187195	HIST1H4M, HIST1H1D, HIST2H3C2, HIST2H4	8	283	8979	11.898
GOTERM_BP_FAT	GO:0051276~chromosome organization	3	2.30769	0.0194028	HIST1H4M, HIST1H1D, HIST2H3C2, HIST2H4	9	337	12092	11.9604
GOTERM_CC_FAT	GO:0005694~chromosome	3	2.30769	0.0198256	HIST1H4M, HIST1H1D, HIST2H3C2, HIST2H4	8	350	10776	11.5457
GOTERM_BP_FAT	GO:0003014~renal system process	2	1.53846	0.0203322	LNPEP, AVP	9	31	12092	86.681
GOTERM_BP_FAT	GO:0045776~negative regulation of blood pressure	2	1.53846	0.0203322	PMCH, OXT	9	31	12092	86.681
GOTERM_BP_FAT	GO:0031645~negative regulation of neurological system process	2	1.53846	0.020982	AVP, PMCH	9	32	12092	83.9722
GOTERM_BP_FAT	GO:0051705~behavioral interaction between organisms	2	1.53846	0.020982	AVP, OXT	9	32	12092	83.9722
GOTERM_BP_FAT	GO:0045777~positive regulation of blood pressure	2	1.53846	0.0216314	AVP, OXT	9	33	12092	81.4276
GOTERM_BP_FAT	GO:0006873~cellular ion homeostasis	3	2.30769	0.0231392	AVP, PMCH, OXT	9	370	12092	10.8937
GOTERM_BP_FAT	GO:0055082~cellular chemical homeostasis	3	2.30769	0.0237301	AVP, PMCH, OXT	9	375	12092	10.7484
GOTERM_BP_FAT	GO:0032846~positive regulation of homeostatic process	2	1.53846	0.0242254	AVP, OXT	9	37	12092	72.6246
GOTERM_BP_FAT	GO:0007595~lactation	2	1.53846	0.0242254	PMCH, OXT	9	37	12092	72.6246
GOTERM_BP_FAT	GO:0006970~response to osmotic stress	2	1.53846	0.0261669	AVP, OXT	9	40	12092	67.1778
GOTERM_BP_FAT	GO:0009628~response to abiotic stimulus	3	2.30769	0.0266549	AVP, PMCH, OXT	9	399	12092	10.1019
KEGG_PATHWAY	rno05322:Systemic lupus erythematosus	2	1.53846	0.031944	HIST1H4M, HIST2H3C2, HIST2H4	3	90	5590	41.4074
GOTERM_BP_FAT	GO:0048168~regulation of neuronal synaptic plasticity	2	1.53846	0.0319712	LNPEP, PMCH	9	49	12092	54.839
GOTERM_BP_FAT	GO:0048609~reproductive process in a multicellular organism	3	2.30769	0.0323872	AVP, PMCH, OXT	9	443	12092	9.09857
GOTERM_BP_FAT	GO:0032504~multicellular organism reproduction	3	2.30769	0.0323872	AVP, PMCH, OXT	9	443	12092	9.09857
GOTERM_BP_FAT	GO:0019725~cellular homeostasis	3	2.30769	0.0337548	AVP, PMCH, OXT	9	453	12092	8.89772
GOTERM_CC_FAT	GO:0005615~extracellular space	3	2.30769	0.0375023	AVP, PMCH, OXT	8	492	10776	8.21341
GOTERM_CC_FAT	GO:0016023~cytoplasmic membrane-bounded vesicle	3	2.30769	0.0415301	LNPEP, AVP, OXT	8	520	10776	7.77115
GOTERM_BP_FAT	GO:0008016~regulation of heart contraction	2	1.53846	0.0415777	PMCH, OXT	9	64	12092	41.9861
GOTERM_BP_FAT	GO:0009725~response to hormone stimulus	3	2.30769	0.0419876	LNPEP, AVP, OXT	9	510	12092	7.90327
GOTERM_CC_FAT	GO:0031988~membrane-bounded vesicle	3	2.30769	0.0449627	LNPEP, AVP, OXT	8	543	10776	7.44199
GOTERM_BP_FAT	GO:0043279~response to alkaloid	2	1.53846	0.0479357	AVP, OXT	9	74	12092	36.3123
GOTERM_BP_FAT	GO:0007631~feeding behavior	2	1.53846	0.0498358	PMCH, OXT	9	77	12092	34.8975
GOTERM_BP_FAT	GO:0009719~response to endogenous stimulus	3	2.30769	0.0519085	LNPEP, AVP, OXT	9	573	12092	7.03432
GOTERM_BP_FAT	GO:0048167~regulation of synaptic plasticity	2	1.53846	0.0523642	LNPEP, PMCH	9	81	12092	33.1742
GOTERM_CC_FAT	GO:0031410~cytoplasmic vesicle	3	2.30769	0.0531194	LNPEP, AVP, OXT	8	595	10776	6.7916
GOTERM_CC_FAT	GO:0031982~vesicle	3	2.30769	0.0590738	LNPEP, AVP, OXT	8	631	10776	6.40412
GOTERM_BP_FAT	GO:0030879~mammary gland development	2	1.53846	0.0605409	PMCH, OXT	9	94	12092	28.5863
SP_PIR_KEYWORDS	dna-binding	3	2.30769	0.0663596	HIST1H4M, HIST1H1D, HIST2H3C2, HIST2H4	8	561	8979	6.00201
GOTERM_CC_FAT	GO:0044421~extracellular region part	3	2.30769	0.0698832	AVP, PMCH, OXT	8	693	10776	5.83117
GOTERM_BP_FAT	GO:0032844~regulation of homeostatic process	2	1.53846	0.0723804	AVP, OXT	9	113	12092	23.7797
GOTERM_BP_FAT	GO:0051047~positive regulation of secretion	2	1.53846	0.0760919	AVP, OXT	9	119	12092	22.5808
GOTERM_BP_FAT	GO:0007611~learning or memory	2	1.53846	0.0840891	PMCH, OXT	9	132	12092	20.3569
SP_PIR_KEYWORDS	DNA binding	2	1.53846	0.0855872	HIST1H4M, HIST1H1D, HIST2H4	8	114	8979	19.6908
